# Supplementary material for: FAM21 is critical for TLR2/CLEC4E-mediated dendritic cell function against Candida albicans
Source: Life Sci Alliance. 2023 Jan 30;6(4):e202201414. doi: 10.26508/lsa.202201414 (PMC9888482; doi:10.26508/lsa.202201414)
Supplement: Supplementary file 1 [file LSA-2022-01414_SdataF1.xlsx]

## Sheet: Figure 1E
	EEA1 size - Area (um2)
	WT	cKO
	0.0694725	0.0694725
	0.0694725	0.0694725
	0.0694725	0.0694725
	0.0694725	0.0694725
	0.0694725	0.0694725
	0.0694725	0.0694725
	0.0694725	0.0694725
	0.0694725	0.0694725
	0.0694725	0.0694725
	0.0694725	0.0694725
	0.0694725	0.0694725
	0.0694725	0.0694725
	0.0694725	0.0694725
	0.0694725	0.0694725
	0.0694725	0.0694725
	0.0694725	0.0694725
	0.0694725	0.0694725
	0.0694725	0.0694725
	0.0694725	0.0694725
	0.0694725	0.0694725
	0.0694725	0.0694725
	0.0694725	0.0694725
	0.0694725	0.0694725
	0.0694725	0.0694725
	0.0694725	0.0694725
	0.0694725	0.0694725
	0.0694725	0.0694725
	0.0694725	0.0694725
	0.0694725	0.0694725
	0.0694725	0.0694725
	0.0694725	0.0694725
	0.0694725	0.0694725
	0.0694725	0.0694725
	0.0694725	0.0694725
	0.0694725	0.0694725
	0.0694725	0.0694725
	0.0694725	0.0694725
	0.0694725	0.0694725
	0.0694725	0.0694725
	0.0694725	0.0694725
	0.0694725	0.0694725
	0.0694725	0.0694725
	0.0694725	0.0694725
	0.0694725	0.0694725
	0.0694725	0.0694725
	0.0694725	0.0694725
	0.0694725	0.0694725
	0.0694725	0.0694725
	0.0694725	0.0694725
	0.0694725	0.0694725
	0.0694725	0.0694725
	0.0694725	0.0694725
	0.0694725	0.0694725
	0.0694725	0.0694725
	0.0694725	0.0694725
	0.0694725	0.0694725
	0.0694725	0.0694725
	0.0694725	0.0694725
	0.0694725	0.0694725
	0.0694725	0.0694725
	0.0694725	0.0694725
	0.0694725	0.0694725
	0.0694725	0.0694725
	0.0694725	0.0694725
	0.0694725	0.0694725
	0.0694725	0.0694725
	0.0694725	0.0694725
	0.0694725	0.0694725
	0.0694725	0.0694725
	0.0694725	0.0694725
	0.0694725	0.0694725
	0.0694725	0.0694725
	0.0694725	0.0694725
	0.0694725	0.0694725
	0.0694725	0.0694725
	0.0694725	0.0694725
	0.0694725	0.0694725
	0.0694725	0.0694725
	0.0694725	0.0694725
	0.0694725	0.0694725
	0.0694725	0.0694725
	0.0694725	0.0694725
	0.0694725	0.0694725
	0.0694725	0.0694725
	0.0694725	0.0694725
	0.0694725	0.0694725
	0.0694725	0.0694725
	0.0694725	0.0694725
	0.0694725	0.0694725
	0.0694725	0.0694725
	0.0694725	0.0694725
	0.0694725	0.0694725
	0.0694725	0.0694725
	0.0694725	0.0694725
	0.0694725	0.0694725
	0.0694725	0.0694725
	0.0694725	0.0694725
	0.0694725	0.0694725
	0.0694725	0.0694725
	0.0694725	0.0694725
	0.0694725	0.0694725
	0.0694725	0.0694725
	0.0694725	0.0694725
	0.0694725	0.0694725
	0.0694725	0.0694725
	0.0694725	0.0694725
	0.0694725	0.0694725
	0.0694725	0.0694725
	0.0694725	0.0694725
	0.0694725	0.0694725
	0.0694725	0.0694725
	0.0694725	0.0694725
	0.0694725	0.0694725
	0.0694725	0.0694725
	0.0694725	0.0694725
	0.0694725	0.0694725
	0.0694725	0.0694725
	0.0694725	0.0694725
	0.0694725	0.0694725
	0.0694725	0.0694725
	0.0694725	0.0694725
	0.0694725	0.0694725
	0.0694725	0.0694725
	0.0694725	0.0694725
	0.0694725	0.0694725
	0.0694725	0.0694725
	0.0694725	0.0694725
	0.0694725	0.0694725
	0.0694725	0.0694725
	0.0694725	0.0694725
	0.0694725	0.0694725
	0.0694725	0.0694725
	0.0694725	0.0694725
	0.0694725	0.0694725
	0.0694725	0.0694725
	0.0694725	0.0694725
	0.0694725	0.0694725
	0.0694725	0.0694725
	0.0694725	0.0694725
	0.0694725	0.0694725
	0.0694725	0.0694725
	0.0694725	0.0694725
	0.0694725	0.0694725
	0.0694725	0.0694725
	0.0694725	0.0694725
	0.0694725	0.0694725
	0.0694725	0.0694725
	0.0694725	0.0694725
	0.0694725	0.0694725
	0.0694725	0.0694725
	0.0694725	0.0694725
	0.0694725	0.0694725
	0.0694725	0.0694725
	0.0694725	0.0694725
	0.0694725	0.0694725
	0.0694725	0.0694725
	0.0694725	0.0694725
	0.0694725	0.0694725
	0.0694725	0.0694725
	0.0694725	0.0694725
	0.0694725	0.0694725
	0.0694725	0.0694725
	0.0694725	0.0694725
	0.0694725	0.0694725
	0.0694725	0.0694725
	0.0694725	0.0694725
	0.0694725	0.0694725
	0.0694725	0.0694725
	0.0694725	0.0694725
	0.0694725	0.0694725
	0.0694725	0.0694725
	0.0694725	0.0694725
	0.0694725	0.0694725
	0.0694725	0.0694725
	0.0694725	0.0694725
	0.0694725	0.0694725
	0.0694725	0.0694725
	0.0694725	0.0694725
	0.0694725	0.0694725
	0.0694725	0.0694725
	0.0694725	0.0694725
	0.0694725	0.0694725
	0.0694725	0.0694725
	0.0694725	0.0694725
	0.0694725	0.0694725
	0.0694725	0.0694725
	0.0694725	0.0694725
	0.0694725	0.0694725
	0.0694725	0.0694725
	0.0694725	0.0694725
	0.0694725	0.0694725
	0.0694725	0.0694725
	0.0694725	0.0694725
	0.0694725	0.0694725
	0.0694725	0.0694725
	0.0694725	0.0694725
	0.069473	0.0694725
	0.069473	0.0694725
	0.069473	0.0694725
	0.069473	0.0694725
	0.069473	0.0694725
	0.069473	0.0694725
	0.069473	0.0694725
	0.069473	0.0694725
	0.069473	0.0694725
	0.069473	0.0694725
	0.069473	0.0694725
	0.069473	0.0694725
	0.069473	0.0694725
	0.069473	0.0694725
	0.069473	0.0694725
	0.069473	0.0694725
	0.069473	0.0694725
	0.069473	0.0694725
	0.069473	0.0694725
	0.069473	0.0694725
	0.069473	0.0694725
	0.069473	0.0694725
	0.069473	0.0694725
	0.069473	0.0694725
	0.069473	0.0694725
	0.069473	0.0694725
	0.069473	0.0694725
	0.069473	0.0694725
	0.069473	0.0694725
	0.069473	0.0694725
	0.069473	0.0694725
	0.069473	0.0694725
	0.069473	0.0694725
	0.069473	0.0694725
	0.069473	0.0694725
	0.069473	0.0694725
	0.069473	0.0694725
	0.069473	0.0694725
	0.069473	0.0694725
	0.069473	0.0694725
	0.069473	0.0694725
	0.069473	0.0694725
	0.069473	0.0694725
	0.069473	0.0694725
	0.069473	0.0694725
	0.069473	0.0694725
	0.069473	0.0694725
	0.069473	0.0694725
	0.069473	0.0694725
	0.069473	0.0694725
	0.069473	0.0694725
	0.069473	0.0694725
	0.069473	0.0694725
	0.069473	0.0694725
	0.069473	0.0868407
	0.069473	0.0868407
	0.069473	0.0868407
	0.069473	0.0868407
	0.069473	0.0868407
	0.069473	0.0868407
	0.069473	0.0868407
	0.069473	0.0868407
	0.069473	0.0868407
	0.069473	0.0868407
	0.069473	0.0868407
	0.069473	0.0868407
	0.069473	0.0868407
	0.069473	0.0868407
	0.069473	0.0868407
	0.069473	0.0868407
	0.069473	0.0868407
	0.069473	0.0868407
	0.069473	0.0868407
	0.069473	0.0868407
	0.069473	0.0868407
	0.069473	0.0868407
	0.069473	0.0868407
	0.069473	0.0868407
	0.069473	0.0868407
	0.069473	0.0868407
	0.069473	0.0868407
	0.069473	0.0868407
	0.069473	0.0868407
	0.069473	0.0868407
	0.069473	0.0868407
	0.069473	0.0868407
	0.069473	0.0868407
	0.069473	0.0868407
	0.0868407	0.0868407
	0.0868407	0.0868407
	0.0868407	0.0868407
	0.0868407	0.0868407
	0.0868407	0.0868407
	0.0868407	0.0868407
	0.0868407	0.0868407
	0.0868407	0.0868407
	0.0868407	0.0868407
	0.0868407	0.0868407
	0.0868407	0.0868407
	0.0868407	0.0868407
	0.0868407	0.0868407
	0.0868407	0.0868407
	0.0868407	0.0868407
	0.0868407	0.0868407
	0.0868407	0.0868407
	0.0868407	0.0868407
	0.0868407	0.0868407
	0.0868407	0.0868407
	0.0868407	0.0868407
	0.0868407	0.0868407
	0.0868407	0.0868407
	0.0868407	0.0868407
	0.0868407	0.0868407
	0.0868407	0.0868407
	0.0868407	0.0868407
	0.0868407	0.0868407
	0.0868407	0.0868407
	0.0868407	0.0868407
	0.0868407	0.0868407
	0.0868407	0.0868407
	0.0868407	0.0868407
	0.0868407	0.0868407
	0.0868407	0.0868407
	0.0868407	0.0868407
	0.0868407	0.0868407
	0.0868407	0.0868407
	0.0868407	0.0868407
	0.0868407	0.0868407
	0.0868407	0.0868407
	0.0868407	0.0868407
	0.0868407	0.0868407
	0.0868407	0.0868407
	0.0868407	0.0868407
	0.0868407	0.0868407
	0.0868407	0.0868407
	0.0868407	0.0868407
	0.0868407	0.0868407
	0.0868407	0.0868407
	0.0868407	0.0868407
	0.0868407	0.0868407
	0.0868407	0.0868407
	0.0868407	0.0868407
	0.0868407	0.0868407
	0.0868407	0.0868407
	0.0868407	0.0868407
	0.0868407	0.0868407
	0.0868407	0.0868407
	0.0868407	0.0868407
	0.0868407	0.0868407
	0.0868407	0.0868407
	0.0868407	0.0868407
	0.0868407	0.0868407
	0.0868407	0.0868407
	0.0868407	0.0868407
	0.0868407	0.0868407
	0.0868407	0.0868407
	0.0868407	0.0868407
	0.0868407	0.0868407
	0.0868407	0.0868407
	0.0868407	0.0868407
	0.0868407	0.0868407
	0.0868407	0.0868407
	0.0868407	0.0868407
	0.0868407	0.0868407
	0.0868407	0.0868407
	0.0868407	0.0868407
	0.0868407	0.0868407
	0.0868407	0.0868407
	0.0868407	0.0868407
	0.0868407	0.0868407
	0.0868407	0.0868407
	0.0868407	0.0868407
	0.0868407	0.0868407
	0.0868407	0.0868407
	0.0868407	0.0868407
	0.0868407	0.0868407
	0.0868407	0.0868407
	0.0868407	0.0868407
	0.0868407	0.0868407
	0.0868407	0.0868407
	0.0868407	0.0868407
	0.0868407	0.0868407
	0.0868407	0.0868407
	0.0868407	0.0868407
	0.0868407	0.0868407
	0.0868407	0.0868407
	0.0868407	0.0868407
	0.0868407	0.0868407
	0.0868407	0.0868407
	0.0868407	0.0868407
	0.0868407	0.0868407
	0.0868407	0.0868407
	0.0868407	0.0868407
	0.0868407	0.0868407
	0.0868407	0.0868407
	0.0868407	0.0868407
	0.0868407	0.0868407
	0.0868407	0.0868407
	0.0868407	0.0868407
	0.0868407	0.0868407
	0.0868407	0.0868407
	0.0868407	0.0868407
	0.0868407	0.0868407
	0.0868407	0.0868407
	0.0868407	0.0868407
	0.0868407	0.0868407
	0.0868407	0.0868407
	0.0868407	0.0868407
	0.0868407	0.0868407
	0.0868407	0.0868407
	0.0868407	0.0868407
	0.0868407	0.0868407
	0.0868407	0.0868407
	0.0868407	0.0868407
	0.0868407	0.0868407
	0.0868407	0.0868407
	0.0868407	0.0868407
	0.0868407	0.0868407
	0.0868407	0.0868407
	0.0868407	0.0868407
	0.0868407	0.0868407
	0.0868407	0.0868407
	0.0868407	0.0868407
	0.0868407	0.0868407
	0.0868407	0.0868407
	0.0868407	0.0868407
	0.0868407	0.0868407
	0.0868407	0.0868407
	0.0868407	0.0868407
	0.0868407	0.0868407
	0.0868407	0.0868407
	0.0868407	0.0868407
	0.0868407	0.0868407
	0.0868407	0.0868407
	0.0868407	0.0868407
	0.0868407	0.0868407
	0.0868407	0.0868407
	0.0868407	0.0868407
	0.086841	0.0868407
	0.086841	0.0868407
	0.086841	0.0868407
	0.086841	0.0868407
	0.086841	0.0868407
	0.086841	0.0868407
	0.086841	0.0868407
	0.086841	0.0868407
	0.086841	0.0868407
	0.086841	0.104209
	0.086841	0.104209
	0.086841	0.104209
	0.086841	0.104209
	0.086841	0.104209
	0.086841	0.104209
	0.086841	0.104209
	0.086841	0.104209
	0.086841	0.104209
	0.086841	0.104209
	0.086841	0.104209
	0.086841	0.104209
	0.086841	0.104209
	0.086841	0.104209
	0.086841	0.104209
	0.086841	0.104209
	0.086841	0.104209
	0.086841	0.104209
	0.086841	0.104209
	0.086841	0.104209
	0.086841	0.104209
	0.086841	0.104209
	0.086841	0.104209
	0.086841	0.104209
	0.086841	0.104209
	0.086841	0.104209
	0.086841	0.104209
	0.086841	0.104209
	0.086841	0.104209
	0.086841	0.104209
	0.086841	0.104209
	0.086841	0.104209
	0.086841	0.104209
	0.086841	0.104209
	0.086841	0.104209
	0.086841	0.104209
	0.086841	0.104209
	0.086841	0.104209
	0.086841	0.104209
	0.086841	0.104209
	0.086841	0.104209
	0.086841	0.104209
	0.086841	0.104209
	0.086841	0.104209
	0.086841	0.104209
	0.086841	0.104209
	0.086841	0.104209
	0.086841	0.104209
	0.086841	0.104209
	0.086841	0.104209
	0.086841	0.104209
	0.086841	0.104209
	0.086841	0.104209
	0.086841	0.104209
	0.086841	0.104209
	0.086841	0.104209
	0.086841	0.104209
	0.086841	0.104209
	0.086841	0.104209
	0.086841	0.104209
	0.086841	0.104209
	0.086841	0.104209
	0.086841	0.104209
	0.086841	0.104209
	0.104209	0.104209
	0.104209	0.104209
	0.104209	0.104209
	0.104209	0.104209
	0.104209	0.104209
	0.104209	0.104209
	0.104209	0.104209
	0.104209	0.104209
	0.104209	0.104209
	0.104209	0.104209
	0.104209	0.104209
	0.104209	0.104209
	0.104209	0.104209
	0.104209	0.104209
	0.104209	0.104209
	0.104209	0.104209
	0.104209	0.104209
	0.104209	0.104209
	0.104209	0.104209
	0.104209	0.104209
	0.104209	0.104209
	0.104209	0.104209
	0.104209	0.104209
	0.104209	0.104209
	0.104209	0.104209
	0.104209	0.104209
	0.104209	0.104209
	0.104209	0.104209
	0.104209	0.104209
	0.104209	0.104209
	0.104209	0.104209
	0.104209	0.104209
	0.104209	0.104209
	0.104209	0.104209
	0.104209	0.104209
	0.104209	0.104209
	0.104209	0.104209
	0.104209	0.104209
	0.104209	0.104209
	0.104209	0.104209
	0.104209	0.104209
	0.104209	0.104209
	0.104209	0.104209
	0.104209	0.104209
	0.104209	0.104209
	0.104209	0.104209
	0.104209	0.104209
	0.104209	0.104209
	0.104209	0.104209
	0.104209	0.104209
	0.104209	0.104209
	0.104209	0.104209
	0.104209	0.104209
	0.104209	0.104209
	0.104209	0.104209
	0.104209	0.104209
	0.104209	0.104209
	0.104209	0.104209
	0.104209	0.104209
	0.104209	0.104209
	0.104209	0.104209
	0.104209	0.104209
	0.104209	0.104209
	0.104209	0.104209
	0.104209	0.104209
	0.104209	0.104209
	0.104209	0.104209
	0.104209	0.104209
	0.104209	0.104209
	0.104209	0.104209
	0.104209	0.104209
	0.104209	0.104209
	0.104209	0.104209
	0.104209	0.104209
	0.104209	0.104209
	0.104209	0.104209
	0.104209	0.104209
	0.104209	0.104209
	0.104209	0.104209
	0.104209	0.104209
	0.104209	0.104209
	0.104209	0.104209
	0.104209	0.104209
	0.104209	0.104209
	0.104209	0.104209
	0.104209	0.104209
	0.104209	0.104209
	0.104209	0.104209
	0.104209	0.104209
	0.104209	0.104209
	0.104209	0.104209
	0.104209	0.104209
	0.104209	0.104209
	0.104209	0.104209
	0.104209	0.104209
	0.104209	0.104209
	0.104209	0.104209
	0.104209	0.104209
	0.104209	0.104209
	0.104209	0.104209
	0.104209	0.104209
	0.104209	0.104209
	0.104209	0.104209
	0.104209	0.104209
	0.104209	0.104209
	0.104209	0.104209
	0.104209	0.104209
	0.104209	0.104209
	0.104209	0.104209
	0.104209	0.104209
	0.104209	0.104209
	0.104209	0.104209
	0.104209	0.104209
	0.104209	0.104209
	0.104209	0.104209
	0.104209	0.104209
	0.104209	0.104209
	0.104209	0.104209
	0.104209	0.104209
	0.104209	0.104209
	0.104209	0.104209
	0.104209	0.104209
	0.104209	0.121577
	0.104209	0.121577
	0.104209	0.121577
	0.104209	0.121577
	0.104209	0.121577
	0.104209	0.121577
	0.104209	0.121577
	0.104209	0.121577
	0.104209	0.121577
	0.104209	0.121577
	0.104209	0.121577
	0.104209	0.121577
	0.104209	0.121577
	0.104209	0.121577
	0.104209	0.121577
	0.104209	0.121577
	0.104209	0.121577
	0.104209	0.121577
	0.104209	0.121577
	0.104209	0.121577
	0.104209	0.121577
	0.104209	0.121577
	0.104209	0.121577
	0.104209	0.121577
	0.104209	0.121577
	0.104209	0.121577
	0.104209	0.121577
	0.104209	0.121577
	0.104209	0.121577
	0.104209	0.121577
	0.104209	0.121577
	0.104209	0.121577
	0.104209	0.121577
	0.104209	0.121577
	0.104209	0.121577
	0.104209	0.121577
	0.104209	0.121577
	0.104209	0.121577
	0.104209	0.121577
	0.104209	0.121577
	0.104209	0.121577
	0.104209	0.121577
	0.104209	0.121577
	0.104209	0.121577
	0.104209	0.121577
	0.104209	0.121577
	0.104209	0.121577
	0.104209	0.121577
	0.104209	0.121577
	0.104209	0.121577
	0.104209	0.121577
	0.104209	0.121577
	0.104209	0.121577
	0.104209	0.121577
	0.104209	0.121577
	0.104209	0.121577
	0.104209	0.121577
	0.104209	0.121577
	0.104209	0.121577
	0.104209	0.121577
	0.104209	0.121577
	0.104209	0.121577
	0.104209	0.121577
	0.104209	0.121577
	0.104209	0.121577
	0.104209	0.121577
	0.104209	0.121577
	0.104209	0.121577
	0.121577	0.121577
	0.121577	0.121577
	0.121577	0.121577
	0.121577	0.121577
	0.121577	0.121577
	0.121577	0.121577
	0.121577	0.121577
	0.121577	0.121577
	0.121577	0.121577
	0.121577	0.121577
	0.121577	0.121577
	0.121577	0.121577
	0.121577	0.121577
	0.121577	0.121577
	0.121577	0.121577
	0.121577	0.121577
	0.121577	0.121577
	0.121577	0.121577
	0.121577	0.121577
	0.121577	0.121577
	0.121577	0.121577
	0.121577	0.121577
	0.121577	0.121577
	0.121577	0.121577
	0.121577	0.121577
	0.121577	0.121577
	0.121577	0.121577
	0.121577	0.121577
	0.121577	0.121577
	0.121577	0.121577
	0.121577	0.121577
	0.121577	0.121577
	0.121577	0.121577
	0.121577	0.121577
	0.121577	0.121577
	0.121577	0.121577
	0.121577	0.121577
	0.121577	0.121577
	0.121577	0.121577
	0.121577	0.121577
	0.121577	0.121577
	0.121577	0.121577
	0.121577	0.121577
	0.121577	0.121577
	0.121577	0.121577
	0.121577	0.121577
	0.121577	0.121577
	0.121577	0.121577
	0.121577	0.121577
	0.121577	0.121577
	0.121577	0.121577
	0.121577	0.121577
	0.121577	0.121577
	0.121577	0.121577
	0.121577	0.121577
	0.121577	0.121577
	0.121577	0.121577
	0.121577	0.121577
	0.121577	0.121577
	0.121577	0.121577
	0.121577	0.121577
	0.121577	0.121577
	0.121577	0.121577
	0.121577	0.121577
	0.121577	0.121577
	0.121577	0.121577
	0.121577	0.121577
	0.121577	0.121577
	0.121577	0.121577
	0.121577	0.121577
	0.121577	0.121577
	0.121577	0.121577
	0.121577	0.121577
	0.121577	0.121577
	0.121577	0.121577
	0.121577	0.121577
	0.121577	0.121577
	0.121577	0.121577
	0.121577	0.121577
	0.121577	0.121577
	0.121577	0.121577
	0.121577	0.121577
	0.121577	0.121577
	0.121577	0.121577
	0.121577	0.121577
	0.121577	0.121577
	0.121577	0.121577
	0.121577	0.121577
	0.121577	0.121577
	0.121577	0.121577
	0.121577	0.121577
	0.121577	0.121577
	0.121577	0.121577
	0.121577	0.121577
	0.121577	0.121577
	0.121577	0.121577
	0.121577	0.138945
	0.121577	0.138945
	0.121577	0.138945
	0.121577	0.138945
	0.121577	0.138945
	0.121577	0.138945
	0.121577	0.138945
	0.121577	0.138945
	0.121577	0.138945
	0.121577	0.138945
	0.121577	0.138945
	0.121577	0.138945
	0.121577	0.138945
	0.121577	0.138945
	0.121577	0.138945
	0.121577	0.138945
	0.121577	0.138945
	0.121577	0.138945
	0.121577	0.138945
	0.121577	0.138945
	0.121577	0.138945
	0.121577	0.138945
	0.121577	0.138945
	0.121577	0.138945
	0.121577	0.138945
	0.121577	0.138945
	0.121577	0.138945
	0.121577	0.138945
	0.121577	0.138945
	0.121577	0.138945
	0.121577	0.138945
	0.121577	0.138945
	0.121577	0.138945
	0.121577	0.138945
	0.121577	0.138945
	0.121577	0.138945
	0.121577	0.138945
	0.121577	0.138945
	0.121577	0.138945
	0.121577	0.138945
	0.121577	0.138945
	0.121577	0.138945
	0.121577	0.138945
	0.121577	0.138945
	0.121577	0.138945
	0.121577	0.138945
	0.121577	0.138945
	0.138945	0.138945
	0.138945	0.138945
	0.138945	0.138945
	0.138945	0.138945
	0.138945	0.138945
	0.138945	0.138945
	0.138945	0.138945
	0.138945	0.138945
	0.138945	0.138945
	0.138945	0.138945
	0.138945	0.138945
	0.138945	0.138945
	0.138945	0.138945
	0.138945	0.138945
	0.138945	0.138945
	0.138945	0.138945
	0.138945	0.138945
	0.138945	0.138945
	0.138945	0.138945
	0.138945	0.138945
	0.138945	0.138945
	0.138945	0.138945
	0.138945	0.138945
	0.138945	0.138945
	0.138945	0.138945
	0.138945	0.138945
	0.138945	0.138945
	0.138945	0.138945
	0.138945	0.138945
	0.138945	0.138945
	0.138945	0.138945
	0.138945	0.138945
	0.138945	0.138945
	0.138945	0.138945
	0.138945	0.138945
	0.138945	0.138945
	0.138945	0.138945
	0.138945	0.138945
	0.138945	0.138945
	0.138945	0.138945
	0.138945	0.138945
	0.138945	0.138945
	0.138945	0.138945
	0.138945	0.138945
	0.138945	0.138945
	0.138945	0.138945
	0.138945	0.138945
	0.138945	0.138945
	0.138945	0.138945
	0.138945	0.138945
	0.138945	0.138945
	0.138945	0.138945
	0.138945	0.138945
	0.138945	0.138945
	0.138945	0.138945
	0.138945	0.138945
	0.138945	0.138945
	0.138945	0.138945
	0.138945	0.138945
	0.138945	0.138945
	0.138945	0.138945
	0.138945	0.138945
	0.138945	0.138945
	0.138945	0.138945
	0.138945	0.138945
	0.138945	0.138945
	0.138945	0.138945
	0.138945	0.138945
	0.138945	0.138945
	0.138945	0.156313
	0.138945	0.156313
	0.138945	0.156313
	0.138945	0.156313
	0.138945	0.156313
	0.138945	0.156313
	0.138945	0.156313
	0.138945	0.156313
	0.138945	0.156313
	0.138945	0.156313
	0.138945	0.156313
	0.138945	0.156313
	0.138945	0.156313
	0.138945	0.156313
	0.138945	0.156313
	0.138945	0.156313
	0.138945	0.156313
	0.138945	0.156313
	0.138945	0.156313
	0.138945	0.156313
	0.138945	0.156313
	0.138945	0.156313
	0.138945	0.156313
	0.138945	0.156313
	0.138945	0.156313
	0.138945	0.156313
	0.138945	0.156313
	0.138945	0.156313
	0.138945	0.156313
	0.138945	0.156313
	0.138945	0.156313
	0.138945	0.156313
	0.138945	0.156313
	0.138945	0.156313
	0.138945	0.156313
	0.138945	0.156313
	0.138945	0.156313
	0.138945	0.156313
	0.138945	0.156313
	0.138945	0.156313
	0.138945	0.156313
	0.138945	0.156313
	0.138945	0.156313
	0.138945	0.156313
	0.138945	0.156313
	0.138945	0.156313
	0.138945	0.156313
	0.138945	0.156313
	0.138945	0.156313
	0.138945	0.156313
	0.138945	0.156313
	0.138945	0.156313
	0.138945	0.156313
	0.138945	0.156313
	0.138945	0.156313
	0.138945	0.156313
	0.138945	0.156313
	0.138945	0.156313
	0.138945	0.156313
	0.138945	0.156313
	0.138945	0.156313
	0.138945	0.156313
	0.138945	0.156313
	0.138945	0.156313
	0.138945	0.156313
	0.138945	0.156313
	0.138945	0.156313
	0.138945	0.156313
	0.138945	0.156313
	0.156313	0.156313
	0.156313	0.156313
	0.156313	0.156313
	0.156313	0.156313
	0.156313	0.156313
	0.156313	0.156313
	0.156313	0.156313
	0.156313	0.156313
	0.156313	0.156313
	0.156313	0.156313
	0.156313	0.156313
	0.156313	0.156313
	0.156313	0.156313
	0.156313	0.156313
	0.156313	0.156313
	0.156313	0.156313
	0.156313	0.156313
	0.156313	0.156313
	0.156313	0.156313
	0.156313	0.156313
	0.156313	0.156313
	0.156313	0.156313
	0.156313	0.156313
	0.156313	0.156313
	0.156313	0.156313
	0.156313	0.156313
	0.156313	0.156313
	0.156313	0.156313
	0.156313	0.156313
	0.156313	0.156313
	0.156313	0.156313
	0.156313	0.156313
	0.156313	0.156313
	0.156313	0.156313
	0.156313	0.156313
	0.156313	0.156313
	0.156313	0.156313
	0.156313	0.156313
	0.156313	0.156313
	0.156313	0.156313
	0.156313	0.156313
	0.156313	0.156313
	0.156313	0.156313
	0.156313	0.156313
	0.156313	0.156313
	0.156313	0.156313
	0.156313	0.156313
	0.156313	0.156313
	0.156313	0.156313
	0.156313	0.156313
	0.156313	0.156313
	0.156313	0.156313
	0.156313	0.156313
	0.156313	0.156313
	0.156313	0.156313
	0.156313	0.156313
	0.156313	0.156313
	0.156313	0.156313
	0.156313	0.156313
	0.156313	0.156313
	0.156313	0.156313
	0.156313	0.156313
	0.156313	0.156313
	0.156313	0.156313
	0.156313	0.156313
	0.156313	0.173681
	0.156313	0.173681
	0.156313	0.173681
	0.156313	0.173681
	0.156313	0.173681
	0.156313	0.173681
	0.156313	0.173681
	0.156313	0.173681
	0.156313	0.173681
	0.156313	0.173681
	0.156313	0.173681
	0.156313	0.173681
	0.156313	0.173681
	0.156313	0.173681
	0.156313	0.173681
	0.156313	0.173681
	0.156313	0.173681
	0.156313	0.173681
	0.156313	0.173681
	0.156313	0.173681
	0.156313	0.173681
	0.156313	0.173681
	0.156313	0.173681
	0.156313	0.173681
	0.156313	0.173681
	0.156313	0.173681
	0.156313	0.173681
	0.156313	0.173681
	0.156313	0.173681
	0.156313	0.173681
	0.156313	0.173681
	0.156313	0.173681
	0.156313	0.173681
	0.156313	0.173681
	0.156313	0.173681
	0.156313	0.173681
	0.156313	0.173681
	0.156313	0.173681
	0.156313	0.173681
	0.156313	0.173681
	0.156313	0.173681
	0.156313	0.173681
	0.156313	0.173681
	0.156313	0.173681
	0.156313	0.173681
	0.156313	0.173681
	0.156313	0.173681
	0.156313	0.173681
	0.156313	0.173681
	0.156313	0.173681
	0.156313	0.173681
	0.156313	0.173681
	0.156313	0.173681
	0.156313	0.173681
	0.156313	0.173681
	0.156313	0.173681
	0.156313	0.173681
	0.156313	0.173681
	0.156313	0.173681
	0.156313	0.173681
	0.156313	0.173681
	0.156313	0.173681
	0.156313	0.173681
	0.156313	0.173681
	0.156313	0.173681
	0.156313	0.173681
	0.156313	0.173681
	0.156313	0.173681
	0.156313	0.173681
	0.156313	0.173681
	0.156313	0.173681
	0.156313	0.173681
	0.156313	0.173681
	0.156313	0.173681
	0.156313	0.173681
	0.156313	0.173681
	0.173681	0.173681
	0.173681	0.173681
	0.173681	0.173681
	0.173681	0.173681
	0.173681	0.173681
	0.173681	0.173681
	0.173681	0.173681
	0.173681	0.173681
	0.173681	0.173681
	0.173681	0.173681
	0.173681	0.173681
	0.173681	0.173681
	0.173681	0.173681
	0.173681	0.173681
	0.173681	0.173681
	0.173681	0.173681
	0.173681	0.173681
	0.173681	0.173681
	0.173681	0.173681
	0.173681	0.173681
	0.173681	0.173681
	0.173681	0.173681
	0.173681	0.173681
	0.173681	0.173681
	0.173681	0.173681
	0.173681	0.173681
	0.173681	0.173681
	0.173681	0.173681
	0.173681	0.173681
	0.173681	0.173681
	0.173681	0.173681
	0.173681	0.173681
	0.173681	0.173681
	0.173681	0.173681
	0.173681	0.173681
	0.173681	0.173681
	0.173681	0.173681
	0.173681	0.173681
	0.173681	0.173681
	0.173681	0.191049
	0.173681	0.191049
	0.173681	0.191049
	0.173681	0.191049
	0.173681	0.191049
	0.173681	0.191049
	0.173681	0.191049
	0.173681	0.191049
	0.173681	0.191049
	0.173681	0.191049
	0.173681	0.191049
	0.173681	0.191049
	0.173681	0.191049
	0.173681	0.191049
	0.173681	0.191049
	0.173681	0.191049
	0.173681	0.191049
	0.173681	0.191049
	0.173681	0.191049
	0.173681	0.191049
	0.173681	0.191049
	0.173681	0.191049
	0.173681	0.191049
	0.173681	0.191049
	0.173681	0.191049
	0.173681	0.191049
	0.173681	0.191049
	0.173681	0.191049
	0.173681	0.191049
	0.173681	0.191049
	0.173681	0.191049
	0.173681	0.191049
	0.173681	0.191049
	0.173681	0.191049
	0.173681	0.191049
	0.173681	0.191049
	0.173681	0.191049
	0.173681	0.191049
	0.173681	0.191049
	0.173681	0.191049
	0.173681	0.191049
	0.173681	0.191049
	0.173681	0.191049
	0.173681	0.191049
	0.173681	0.191049
	0.173681	0.191049
	0.173681	0.191049
	0.173681	0.191049
	0.173681	0.191049
	0.173681	0.191049
	0.173681	0.191049
	0.173681	0.191049
	0.173681	0.191049
	0.173681	0.191049
	0.173681	0.191049
	0.173681	0.191049
	0.173681	0.191049
	0.173681	0.191049
	0.173681	0.191049
	0.173681	0.191049
	0.173681	0.191049
	0.173681	0.191049
	0.173681	0.191049
	0.173681	0.191049
	0.173681	0.191049
	0.173681	0.191049
	0.173681	0.191049
	0.173681	0.191049
	0.173681	0.191049
	0.173681	0.191049
	0.173681	0.191049
	0.173681	0.191049
	0.173681	0.191049
	0.173681	0.191049
	0.173681	0.191049
	0.173681	0.191049
	0.173681	0.191049
	0.173681	0.191049
	0.173681	0.191049
	0.173681	0.191049
	0.173681	0.191049
	0.173681	0.191049
	0.173681	0.191049
	0.173681	0.191049
	0.191049	0.191049
	0.191049	0.191049
	0.191049	0.191049
	0.191049	0.191049
	0.191049	0.191049
	0.191049	0.191049
	0.191049	0.191049
	0.191049	0.191049
	0.191049	0.191049
	0.191049	0.191049
	0.191049	0.191049
	0.191049	0.191049
	0.191049	0.191049
	0.191049	0.191049
	0.191049	0.191049
	0.191049	0.191049
	0.191049	0.191049
	0.191049	0.191049
	0.191049	0.191049
	0.191049	0.191049
	0.191049	0.191049
	0.191049	0.191049
	0.191049	0.191049
	0.191049	0.191049
	0.191049	0.191049
	0.191049	0.191049
	0.191049	0.191049
	0.191049	0.191049
	0.191049	0.191049
	0.191049	0.191049
	0.191049	0.191049
	0.191049	0.191049
	0.191049	0.191049
	0.191049	0.191049
	0.191049	0.191049
	0.191049	0.191049
	0.191049	0.191049
	0.191049	0.191049
	0.191049	0.191049
	0.191049	0.208418
	0.191049	0.208418
	0.191049	0.208418
	0.191049	0.208418
	0.191049	0.208418
	0.191049	0.208418
	0.191049	0.208418
	0.191049	0.208418
	0.191049	0.208418
	0.191049	0.208418
	0.191049	0.208418
	0.191049	0.208418
	0.191049	0.208418
	0.191049	0.208418
	0.191049	0.208418
	0.191049	0.208418
	0.191049	0.208418
	0.191049	0.208418
	0.191049	0.208418
	0.191049	0.208418
	0.191049	0.208418
	0.191049	0.208418
	0.191049	0.208418
	0.191049	0.208418
	0.191049	0.208418
	0.191049	0.208418
	0.191049	0.208418
	0.191049	0.208418
	0.191049	0.208418
	0.191049	0.208418
	0.191049	0.208418
	0.191049	0.208418
	0.191049	0.208418
	0.191049	0.208418
	0.191049	0.208418
	0.191049	0.208418
	0.191049	0.208418
	0.191049	0.208418
	0.191049	0.208418
	0.191049	0.208418
	0.191049	0.208418
	0.191049	0.208418
	0.191049	0.208418
	0.191049	0.208418
	0.191049	0.208418
	0.191049	0.208418
	0.191049	0.208418
	0.191049	0.208418
	0.191049	0.208418
	0.191049	0.208418
	0.191049	0.208418
	0.191049	0.208418
	0.191049	0.208418
	0.191049	0.208418
	0.191049	0.208418
	0.191049	0.208418
	0.191049	0.208418
	0.191049	0.208418
	0.191049	0.208418
	0.191049	0.208418
	0.191049	0.208418
	0.191049	0.208418
	0.191049	0.208418
	0.191049	0.208418
	0.191049	0.208418
	0.191049	0.208418
	0.191049	0.208418
	0.191049	0.208418
	0.191049	0.208418
	0.191049	0.208418
	0.191049	0.208418
	0.191049	0.208418
	0.191049	0.208418
	0.191049	0.208418
	0.191049	0.208418
	0.191049	0.208418
	0.191049	0.208418
	0.191049	0.208418
	0.191049	0.208418
	0.191049	0.208418
	0.191049	0.208418
	0.191049	0.208418
	0.208418	0.208418
	0.208418	0.208418
	0.208418	0.208418
	0.208418	0.208418
	0.208418	0.208418
	0.208418	0.208418
	0.208418	0.208418
	0.208418	0.208418
	0.208418	0.208418
	0.208418	0.208418
	0.208418	0.225786
	0.208418	0.225786
	0.208418	0.225786
	0.208418	0.225786
	0.208418	0.225786
	0.208418	0.225786
	0.208418	0.225786
	0.208418	0.225786
	0.208418	0.225786
	0.208418	0.225786
	0.208418	0.225786
	0.208418	0.225786
	0.208418	0.225786
	0.208418	0.225786
	0.208418	0.225786
	0.208418	0.225786
	0.208418	0.225786
	0.208418	0.225786
	0.208418	0.225786
	0.208418	0.225786
	0.208418	0.225786
	0.208418	0.225786
	0.208418	0.225786
	0.208418	0.225786
	0.208418	0.225786
	0.208418	0.225786
	0.208418	0.225786
	0.208418	0.225786
	0.208418	0.225786
	0.208418	0.225786
	0.208418	0.225786
	0.208418	0.225786
	0.208418	0.225786
	0.208418	0.225786
	0.208418	0.225786
	0.208418	0.225786
	0.208418	0.225786
	0.208418	0.225786
	0.208418	0.225786
	0.208418	0.225786
	0.208418	0.225786
	0.208418	0.225786
	0.208418	0.225786
	0.208418	0.225786
	0.208418	0.225786
	0.208418	0.225786
	0.208418	0.225786
	0.208418	0.225786
	0.208418	0.225786
	0.208418	0.225786
	0.208418	0.225786
	0.208418	0.225786
	0.208418	0.225786
	0.208418	0.225786
	0.208418	0.225786
	0.208418	0.225786
	0.208418	0.225786
	0.208418	0.225786
	0.208418	0.225786
	0.208418	0.225786
	0.208418	0.225786
	0.208418	0.225786
	0.208418	0.225786
	0.208418	0.225786
	0.208418	0.225786
	0.208418	0.225786
	0.208418	0.225786
	0.208418	0.225786
	0.208418	0.225786
	0.208418	0.225786
	0.208418	0.225786
	0.208418	0.225786
	0.208418	0.225786
	0.208418	0.225786
	0.208418	0.225786
	0.208418	0.225786
	0.208418	0.225786
	0.208418	0.225786
	0.208418	0.225786
	0.208418	0.225786
	0.208418	0.225786
	0.208418	0.225786
	0.208418	0.243154
	0.208418	0.243154
	0.208418	0.243154
	0.208418	0.243154
	0.208418	0.243154
	0.225786	0.243154
	0.225786	0.243154
	0.225786	0.243154
	0.225786	0.243154
	0.225786	0.243154
	0.225786	0.243154
	0.225786	0.243154
	0.225786	0.243154
	0.225786	0.243154
	0.225786	0.243154
	0.225786	0.243154
	0.225786	0.243154
	0.225786	0.243154
	0.225786	0.243154
	0.225786	0.243154
	0.225786	0.243154
	0.225786	0.243154
	0.225786	0.243154
	0.225786	0.243154
	0.225786	0.243154
	0.225786	0.243154
	0.225786	0.243154
	0.225786	0.243154
	0.225786	0.243154
	0.225786	0.243154
	0.225786	0.243154
	0.225786	0.243154
	0.225786	0.243154
	0.225786	0.243154
	0.225786	0.243154
	0.225786	0.243154
	0.225786	0.243154
	0.225786	0.243154
	0.225786	0.243154
	0.225786	0.243154
	0.225786	0.243154
	0.225786	0.243154
	0.225786	0.243154
	0.225786	0.243154
	0.225786	0.243154
	0.225786	0.243154
	0.225786	0.243154
	0.225786	0.243154
	0.225786	0.243154
	0.225786	0.243154
	0.225786	0.243154
	0.225786	0.243154
	0.225786	0.243154
	0.225786	0.243154
	0.225786	0.243154
	0.225786	0.243154
	0.225786	0.243154
	0.225786	0.243154
	0.225786	0.243154
	0.225786	0.243154
	0.225786	0.243154
	0.225786	0.243154
	0.225786	0.243154
	0.225786	0.243154
	0.225786	0.243154
	0.225786	0.243154
	0.225786	0.243154
	0.225786	0.243154
	0.225786	0.243154
	0.225786	0.243154
	0.225786	0.243154
	0.225786	0.243154
	0.225786	0.243154
	0.225786	0.243154
	0.225786	0.243154
	0.225786	0.243154
	0.225786	0.243154
	0.225786	0.243154
	0.225786	0.243154
	0.225786	0.243154
	0.225786	0.243154
	0.225786	0.243154
	0.225786	0.243154
	0.225786	0.243154
	0.225786	0.243154
	0.225786	0.243154
	0.225786	0.243154
	0.225786	0.243154
	0.225786	0.243154
	0.225786	0.243154
	0.225786	0.260522
	0.225786	0.260522
	0.225786	0.260522
	0.225786	0.260522
	0.225786	0.260522
	0.225786	0.260522
	0.243154	0.260522
	0.243154	0.260522
	0.243154	0.260522
	0.243154	0.260522
	0.243154	0.260522
	0.243154	0.260522
	0.243154	0.260522
	0.243154	0.260522
	0.243154	0.260522
	0.243154	0.260522
	0.243154	0.260522
	0.243154	0.260522
	0.243154	0.260522
	0.243154	0.260522
	0.243154	0.260522
	0.243154	0.260522
	0.243154	0.260522
	0.243154	0.260522
	0.243154	0.260522
	0.243154	0.260522
	0.243154	0.260522
	0.243154	0.260522
	0.243154	0.260522
	0.243154	0.260522
	0.243154	0.260522
	0.243154	0.260522
	0.243154	0.260522
	0.243154	0.260522
	0.243154	0.260522
	0.243154	0.260522
	0.243154	0.260522
	0.243154	0.260522
	0.243154	0.260522
	0.243154	0.260522
	0.243154	0.260522
	0.243154	0.260522
	0.243154	0.260522
	0.243154	0.260522
	0.243154	0.260522
	0.243154	0.260522
	0.243154	0.260522
	0.243154	0.260522
	0.243154	0.260522
	0.243154	0.260522
	0.243154	0.260522
	0.243154	0.260522
	0.243154	0.260522
	0.243154	0.260522
	0.243154	0.260522
	0.243154	0.260522
	0.243154	0.260522
	0.243154	0.260522
	0.243154	0.260522
	0.243154	0.260522
	0.243154	0.260522
	0.243154	0.260522
	0.243154	0.260522
	0.243154	0.260522
	0.243154	0.260522
	0.243154	0.260522
	0.243154	0.260522
	0.243154	0.260522
	0.243154	0.260522
	0.243154	0.260522
	0.243154	0.260522
	0.243154	0.260522
	0.243154	0.260522
	0.243154	0.260522
	0.243154	0.260522
	0.243154	0.260522
	0.243154	0.260522
	0.243154	0.260522
	0.243154	0.260522
	0.243154	0.260522
	0.243154	0.260522
	0.243154	0.260522
	0.243154	0.260522
	0.243154	0.260522
	0.243154	0.260522
	0.243154	0.260522
	0.243154	0.260522
	0.243154	0.260522
	0.243154	0.260522
	0.243154	0.260522
	0.243154	0.260522
	0.243154	0.27789
	0.243154	0.27789
	0.243154	0.27789
	0.243154	0.27789
	0.243154	0.27789
	0.243154	0.27789
	0.243154	0.27789
	0.243154	0.27789
	0.243154	0.27789
	0.243154	0.27789
	0.243154	0.27789
	0.243154	0.27789
	0.243154	0.27789
	0.243154	0.27789
	0.243154	0.27789
	0.243154	0.27789
	0.243154	0.27789
	0.243154	0.27789
	0.243154	0.27789
	0.243154	0.27789
	0.243154	0.27789
	0.243154	0.27789
	0.243154	0.27789
	0.243154	0.27789
	0.260522	0.27789
	0.260522	0.27789
	0.260522	0.27789
	0.260522	0.27789
	0.260522	0.27789
	0.260522	0.27789
	0.260522	0.27789
	0.260522	0.27789
	0.260522	0.27789
	0.260522	0.27789
	0.260522	0.27789
	0.260522	0.27789
	0.260522	0.27789
	0.260522	0.27789
	0.260522	0.27789
	0.260522	0.27789
	0.260522	0.27789
	0.260522	0.27789
	0.260522	0.27789
	0.260522	0.27789
	0.260522	0.27789
	0.260522	0.27789
	0.260522	0.27789
	0.260522	0.27789
	0.260522	0.27789
	0.260522	0.27789
	0.260522	0.27789
	0.260522	0.27789
	0.260522	0.27789
	0.260522	0.27789
	0.260522	0.27789
	0.260522	0.27789
	0.260522	0.27789
	0.260522	0.27789
	0.260522	0.27789
	0.260522	0.27789
	0.260522	0.27789
	0.260522	0.27789
	0.260522	0.27789
	0.260522	0.27789
	0.260522	0.27789
	0.260522	0.27789
	0.260522	0.27789
	0.260522	0.27789
	0.260522	0.27789
	0.260522	0.27789
	0.260522	0.27789
	0.260522	0.27789
	0.260522	0.27789
	0.260522	0.27789
	0.260522	0.27789
	0.260522	0.27789
	0.260522	0.295258
	0.260522	0.295258
	0.260522	0.295258
	0.260522	0.295258
	0.260522	0.295258
	0.260522	0.295258
	0.260522	0.295258
	0.260522	0.295258
	0.260522	0.295258
	0.260522	0.295258
	0.260522	0.295258
	0.260522	0.295258
	0.260522	0.295258
	0.260522	0.295258
	0.260522	0.295258
	0.260522	0.295258
	0.260522	0.295258
	0.260522	0.295258
	0.260522	0.295258
	0.260522	0.295258
	0.260522	0.295258
	0.260522	0.295258
	0.260522	0.295258
	0.260522	0.295258
	0.260522	0.295258
	0.260522	0.295258
	0.260522	0.295258
	0.260522	0.295258
	0.260522	0.295258
	0.260522	0.295258
	0.260522	0.295258
	0.260522	0.295258
	0.260522	0.295258
	0.260522	0.295258
	0.260522	0.295258
	0.260522	0.295258
	0.260522	0.295258
	0.260522	0.295258
	0.260522	0.295258
	0.260522	0.295258
	0.260522	0.295258
	0.260522	0.295258
	0.260522	0.295258
	0.27789	0.295258
	0.27789	0.295258
	0.27789	0.295258
	0.27789	0.295258
	0.27789	0.295258
	0.27789	0.295258
	0.27789	0.295258
	0.27789	0.295258
	0.27789	0.295258
	0.27789	0.295258
	0.27789	0.295258
	0.27789	0.295258
	0.27789	0.295258
	0.27789	0.295258
	0.27789	0.295258
	0.27789	0.295258
	0.27789	0.295258
	0.27789	0.295258
	0.27789	0.295258
	0.27789	0.295258
	0.27789	0.312626
	0.27789	0.312626
	0.27789	0.312626
	0.27789	0.312626
	0.27789	0.312626
	0.27789	0.312626
	0.27789	0.312626
	0.27789	0.312626
	0.27789	0.312626
	0.27789	0.312626
	0.27789	0.312626
	0.27789	0.312626
	0.27789	0.312626
	0.27789	0.312626
	0.27789	0.312626
	0.27789	0.312626
	0.27789	0.312626
	0.27789	0.312626
	0.27789	0.312626
	0.27789	0.312626
	0.27789	0.312626
	0.27789	0.312626
	0.27789	0.312626
	0.27789	0.312626
	0.27789	0.312626
	0.27789	0.312626
	0.27789	0.312626
	0.27789	0.312626
	0.27789	0.312626
	0.27789	0.312626
	0.27789	0.312626
	0.27789	0.312626
	0.27789	0.312626
	0.27789	0.312626
	0.27789	0.312626
	0.27789	0.312626
	0.27789	0.312626
	0.27789	0.312626
	0.27789	0.312626
	0.27789	0.312626
	0.27789	0.312626
	0.27789	0.312626
	0.27789	0.312626
	0.27789	0.312626
	0.27789	0.312626
	0.27789	0.312626
	0.27789	0.312626
	0.27789	0.312626
	0.27789	0.312626
	0.27789	0.312626
	0.27789	0.312626
	0.27789	0.312626
	0.27789	0.312626
	0.27789	0.312626
	0.27789	0.312626
	0.27789	0.312626
	0.27789	0.312626
	0.27789	0.312626
	0.27789	0.312626
	0.27789	0.312626
	0.295258	0.312626
	0.295258	0.312626
	0.295258	0.312626
	0.295258	0.312626
	0.295258	0.329995
	0.295258	0.329995
	0.295258	0.329995
	0.295258	0.329995
	0.295258	0.329995
	0.295258	0.329995
	0.295258	0.329995
	0.295258	0.329995
	0.295258	0.329995
	0.295258	0.329995
	0.295258	0.329995
	0.295258	0.329995
	0.295258	0.329995
	0.295258	0.329995
	0.295258	0.329995
	0.295258	0.329995
	0.295258	0.329995
	0.295258	0.329995
	0.295258	0.329995
	0.295258	0.329995
	0.295258	0.329995
	0.295258	0.329995
	0.295258	0.329995
	0.295258	0.329995
	0.295258	0.329995
	0.295258	0.329995
	0.295258	0.329995
	0.295258	0.329995
	0.295258	0.329995
	0.295258	0.329995
	0.295258	0.329995
	0.295258	0.329995
	0.295258	0.329995
	0.295258	0.329995
	0.295258	0.329995
	0.295258	0.329995
	0.295258	0.329995
	0.295258	0.329995
	0.295258	0.329995
	0.295258	0.329995
	0.295258	0.329995
	0.295258	0.329995
	0.295258	0.329995
	0.295258	0.329995
	0.295258	0.329995
	0.295258	0.329995
	0.295258	0.329995
	0.295258	0.329995
	0.295258	0.329995
	0.295258	0.329995
	0.295258	0.329995
	0.295258	0.329995
	0.295258	0.329995
	0.295258	0.329995
	0.295258	0.329995
	0.295258	0.329995
	0.295258	0.329995
	0.295258	0.347363
	0.295258	0.347363
	0.295258	0.347363
	0.295258	0.347363
	0.295258	0.347363
	0.295258	0.347363
	0.295258	0.347363
	0.295258	0.347363
	0.295258	0.347363
	0.312626	0.347363
	0.312626	0.347363
	0.312626	0.347363
	0.312626	0.347363
	0.312626	0.347363
	0.312626	0.347363
	0.312626	0.347363
	0.312626	0.347363
	0.312626	0.347363
	0.312626	0.347363
	0.312626	0.347363
	0.312626	0.347363
	0.312626	0.347363
	0.312626	0.347363
	0.312626	0.347363
	0.312626	0.347363
	0.312626	0.347363
	0.312626	0.347363
	0.312626	0.347363
	0.312626	0.347363
	0.312626	0.347363
	0.312626	0.347363
	0.312626	0.347363
	0.312626	0.347363
	0.312626	0.347363
	0.312626	0.347363
	0.312626	0.347363
	0.312626	0.347363
	0.312626	0.347363
	0.312626	0.347363
	0.312626	0.347363
	0.312626	0.347363
	0.312626	0.347363
	0.312626	0.347363
	0.312626	0.347363
	0.312626	0.347363
	0.312626	0.347363
	0.312626	0.347363
	0.312626	0.347363
	0.312626	0.347363
	0.312626	0.347363
	0.312626	0.347363
	0.312626	0.347363
	0.312626	0.347363
	0.312626	0.347363
	0.312626	0.347363
	0.312626	0.347363
	0.312626	0.347363
	0.312626	0.347363
	0.312626	0.347363
	0.312626	0.364731
	0.312626	0.364731
	0.312626	0.364731
	0.312626	0.364731
	0.312626	0.364731
	0.312626	0.364731
	0.312626	0.364731
	0.312626	0.364731
	0.312626	0.364731
	0.312626	0.364731
	0.312626	0.364731
	0.312626	0.364731
	0.312626	0.364731
	0.312626	0.364731
	0.312626	0.364731
	0.312626	0.364731
	0.312626	0.364731
	0.329995	0.364731
	0.329995	0.364731
	0.329995	0.364731
	0.329995	0.364731
	0.329995	0.364731
	0.329995	0.364731
	0.329995	0.364731
	0.329995	0.364731
	0.329995	0.364731
	0.329995	0.364731
	0.329995	0.364731
	0.329995	0.364731
	0.329995	0.364731
	0.329995	0.364731
	0.329995	0.364731
	0.329995	0.364731
	0.329995	0.364731
	0.329995	0.364731
	0.329995	0.364731
	0.329995	0.364731
	0.329995	0.364731
	0.329995	0.364731
	0.329995	0.364731
	0.329995	0.364731
	0.329995	0.364731
	0.329995	0.364731
[truncated: 2,317 more rows]

## Sheet: Figure 1H
				WT							cKO
	CD11c+	1	1	1	1	1			0.673581	0.675864	0.603722	0.731202	0.53973
	CD11b+	1	1	1	1	1			0.613918	0.753418	0.812161	0.596194	0.687639

## Sheet: Figure 1J
			WT					cKO
	No treatment	1.84683	0.92	1.37			2.85	4.04	3.15183
	CCL19	22.3126	21	23.71			26.15	30.17	29.9817
