# Supplementary material for: FAM21 is critical for TLR2/CLEC4E-mediated dendritic cell function against Candida albicans
Source: Life Sci Alliance. 2023 Jan 30;6(4):e202201414. doi: 10.26508/lsa.202201414 (PMC9888482; doi:10.26508/lsa.202201414)
Supplement: Supplementary file 4 [file LSA-2022-01414_SdataF4.xlsx]

## Sheet: Figure 4B
	Normalized MFI
	WT	cKO
	1	0.518
	1	0.585
	1	0.498

## Sheet: Figure 4D
		15 mins			30 mins
	WT	cKO		WT	cKO
	2	1		4	4
	6	2		1	2
	4	2		8	1
	1	3		7	5
	4	1		3	2
	7	2		1	2
	5	1		1	6
	2	2		5	5
	1	3		10	2
	6	1		4	2
	9	4		5	2
	7	4		6	4
	5	2		1	2
	2	1		2	9
	2	6		2	4
	5	2		4	2
	2	2		15	2
	2	3		11	5
	5	2		5	2
	6	3		6	3
	1	5		2	2
	2	2		2	2
	2	4		2	1
	1	5		1	2
	2	2		3	2
	2	2		7	2
	4	7		2	2
	4	5		4	3
	1	2		2	3
	2	5		2	3
	9	3		1	1
	2	3		2	5
	2	1		5	2
	5	2		8	5
	2	4		5	5
	2	3		6	7
	6	2		6	2
	5	2		3	2
	2	2		4	1
	5	1		4	1
	1	2		2	2
	2	2		8	7
	2	2		4	4
	4	1		1	3
	2	5		6	1
	3	2		3	2
	2	1		2	9
	3	2		8	4
	2	2		3	5
	3	2		2	2
	3	5		3	3
	3	3		1	2
	2	1		5	4
	3	1		7	2
	1	1		3	7
	2	2		1	5
	2	2		3	2
	1	2		2	4
	1	4		1	4
	6	1		4	4
	7	2		2	6
	2	2		2	2
	2	1		6	2
	2	2		8	2
	2	2		4	6
	1	1		4	2
		3		11	2
		2		7	1
		3		5	1
		1		11	2
		2		5	3
				9	2
				4	1
				3	2
				6	3
				2	4
				8	1
				6	2
				5	5
				2	2
				2	2
				1	5
				1	2
				2	2
				1	2
				5	6
				1	9
				2	3
				2	4
				7	4
				8	8
				2	1
				2	6
				5	2
				11	8
				3	1
				6	3
				8	4
				8	6
				8	2
				5	1
				6	6
				10	6
				10	1
				11	2
				2	4
				10	6
				9	3
				4	1
				6	7
				8	1
				8	1
				6	1
				4	4
				7	8
				3	5
				7	3
				6	9
				9	1
				1	9
				5	1
				4	2
				5	6
				3	5
				7	2
				4	5
				6	1
				7	7
				7	3
				9	4
				9	1
				6	4
				11	3
				12	4
				12	5
				7	4
				5	5
				7	6
				9	1
				6	3
				7	2
				7	1
				7	1
				5	4
				9	1
				7	1
				7	3
				8	3
				4	4
				4	4
				4	7
				12
				7
				2
				9
				9
				17
				7
				5
				10
				11
				6
				7
				9
				9
				4
				8
				4
				5
				5
				4

## Sheet: Figure 4F
		IL-1b
				WT					cKO
		NT	0	24.2	0			0	16.338	0
		HKMT 5ug	5275.5	4331.94	4362.32			3252.2	1341.68	2172.46
		C.albicans (1:10)	3447	2050.04	1760.92			987.9	770.76	376.38
		LPS (10ng/ml)	2156	2494.37	1721.84			1473.1	918.04	729.74
		Pam3sk4 (1ug/ml)	498.9	469.402	402.217			262.9	137.004	156.04

## Sheet: Figure 4G
	TNF-a
			WT					cKO
	NT	267	674.55	69.8			137.39	142.15	9.397
	HKMT 5ug	5337.4	8311.75	6589.98			5002.6	6913.7	5772.24
	C.albicans (1:10)	2523.1	1993.52	2898.18			1089.53	855.03	549.8
	Pam3sk4 (1ug/ml)	2204.6	3747.2	2538.26			1216.1	2204.66	948.56
	LPS (10ng/ml)	7233.3	11667.2	11416.8			5130.54	8191.08	3334.94
