# Supplementary material for: FAM21 is critical for TLR2/CLEC4E-mediated dendritic cell function against Candida albicans
Source: Life Sci Alliance. 2023 Jan 30;6(4):e202201414. doi: 10.26508/lsa.202201414 (PMC9888482; doi:10.26508/lsa.202201414)
Supplement: Supplementary file 5 [file LSA-2022-01414_SdataF5.xlsx]

## Sheet: Figure 5A
								WT (% Weight change)																			cKO (% Weight change)
	Day	100	100	100	100	100	100	100	100	100	100	100	100	100	100			100	100	100	100	100	100	100	100	100	100	100	100	100	100
	1	87.82	91.72	90.4	88.22	95.9	93.67	93.45	89.5	90.46	90.47	94.04	88.91	91.26	92.32			98.31	92.33	94.88	94.24	98.16	91.15	93.88	93.79	89.03	91.44	88.27	87.45	89.82	89.03
	2	82.17	82.14	88.01	83.25	90.99	87.89	87.97	82.61	83.94	83.46	85.57	84.43	83.13	89.19				85.09	83.93	88.01	93.19	84.61	85.82	91.13	83.77	82.28	81.97	79.52	84.56	85
	3	76.86	80.98	86.24	82.79	84.29	83.51	82.83	79.41	81.25	82.12	83.15	82.08	80.93	87.9				77.33	78.52	80.52		83.26	83.26	88.63	81.11	78.09	80.05	75.3	85.14	84.23
	4	77.98	80.06	84.02	84.48	81.3	82.6	76.58	76.94	81.22	81.19	80.82	82.94	82.77	89.23				72.2	75.75	77.99		81.29	83.46		81.82	74.47	78.89	73.6	85.83	82.85
	5	75.65	77.88	87.62	88.58	80.48	81.53	76.69	78.53	82.32	80.4	82.08	85.38	85.66	92.62				70.71	75.85	75.74		81.97	80.13		81.59	72.51		72.43	84.25	81.33
	6	76.08	78.57	88.46	90.57	80.06	81.29	76.24	77.68	80.7	80.59	85.47	87.24	86.35	94.21				69.27	73.87			81.11	77.82		78.41	70.28		69.61	80.76	77.63
	7	74.87	77.65	88.24	93.65	79.31	80.62	75.67	76.27	80.38	82.37	88.5	88.87	87.22	95.31								79.19	74.39		75.98	68.74		66.47	78.11	73.61

## Sheet: Figure 5B
	Days post infection	WT	cKO
	0
	1					1	death
	2		1			0	survival
	3		1
	3
	4		1
	4		1
	4		1
	5		1
	5
	6		1
	6		1
	7	1	1
	7	1	1
	7	0	0
	7	0	0
	7	0	0
	7	0	0
	7	0
	7	0
	7	0
	7	0
	7	0
	7	0
	7	0
	7	0
	7

## Sheet: Figure 5C
	kidney titer CFU/gm
	WT	cKO
	0	323757
	41934	5528021
	175000	3059581
	68	745226
	138
	85599
	25309
	68909
	29378
	40632
