# Supplementary material for: FAM21 is critical for TLR2/CLEC4E-mediated dendritic cell function against Candida albicans
Source: Life Sci Alliance. 2023 Jan 30;6(4):e202201414. doi: 10.26508/lsa.202201414 (PMC9888482; doi:10.26508/lsa.202201414)
Supplement: Supplementary file 7 [file LSA-2022-01414_SdataF7.xlsx]

## Sheet: Figure 7A
		WT - PBS (% change)
	Day	0	1	2	3	4	5	6	7
		100	90.0148	89.6688	89.2734	91.8932	92.2887	94.0682	95.2546
		100	90.0814	88.0089	85.9734	86.7876	88.1939	89.1562	89.8964
		100	91.0345	89.8986	88.2759	89.4523	91.4402	92.7789	93.5091
		100	92.4114	90.1772	87.4807	86.9029	88.3667	90.2542	91.1787
		WT - DC (% change)
	Day	0	1	2	3	4	5	6	7
		100	92.8741	87.7435	87.5059	89.1211	91.0214	92.209	94.2518
		100	88.1332	85.5535	85.9756	87.0075	88.8368	89.8218	90.666
		100	88.859	88.4364	89.2048	89.8579	90.4341	90.5494	93.0849
		100	87.5045	87.1813	87.5763	89.2998	89.8743	89.5512	90.2334
		100	90.6641	87.7734	88.3984	87.5	90.2734	91.25	91.8359

## Sheet: Figure 7B
		cKO - PBS (% change)
	Day	0	1	2	3	4	5	6	7
		100	93.0149	82.1992	77.3321	73.3664	69.9865
		100	89.8544	81.6505	80.2913	80.0971	77.8155
		100	94.0306	91.5639	88.6532	85.1011	82.3384	80.8091	79.3784
		100	89.7683	87.9537	83.2432	82.1622	82.2008	82.4324	82.7413
		100	90.6629	87.4697	85.0445	83.1043	77.9305	74.8989	73.6863
		100	90.148	86.215	83.9174	80.5296	78.972	77.0249	73.6371
		cKO - DC (% change)
	Day	0	1	2	3	4	5	6	7
		100	89.9338	88.2325	86.7202	85.5388	86.1531	86.9093	87.6654
		100	88.5981	85.6542	86.7757	87.8505	89.0187	89.6729	90.3738
		100	89.2444	85.8134	84.734	85.1966	86.5459	87.7795	88.4734
		100	90.1063	86.3042	86.7948	87.7351	88.9616	89.861	92.2322
		100	89.9168	86.5558	86.7983	88.5308	89.0159	89.7436	90.6791

## Sheet: Figure 7C
	Days post infection	WT - PBS	WT - DC
	0
	1
	2
	3				1	Death
	3				0	Survival
	4
	4
	4
	5
	5
	6
	6
	7
	7
	7
	7
	7
	7
	7
	7
	7
	7
	7	0	0
	7	0	0
	7	0	0
	7	0	0
	7		0

## Sheet: Figure 7D
	Days post infection	cKO - PBS	cKO - DC
	0
	1
	2
	3				1	Death
	3				0	Survival
	4
	4
	4	1
	5
	5
	6	1
	6	1
	7
	7	1
	7
	7
	7
	7
	7
	7
	7
	7
	7	0	0
	7	0	0
	7		0
	7		0
	7		0
